# Supplementary material
Source: PubMed Central journal article supplement (PMC6205409)
Supplement: jci-128-99673-s218.pdf [file jci-128-99673-s218.pdf]

Supplemental figures and tables

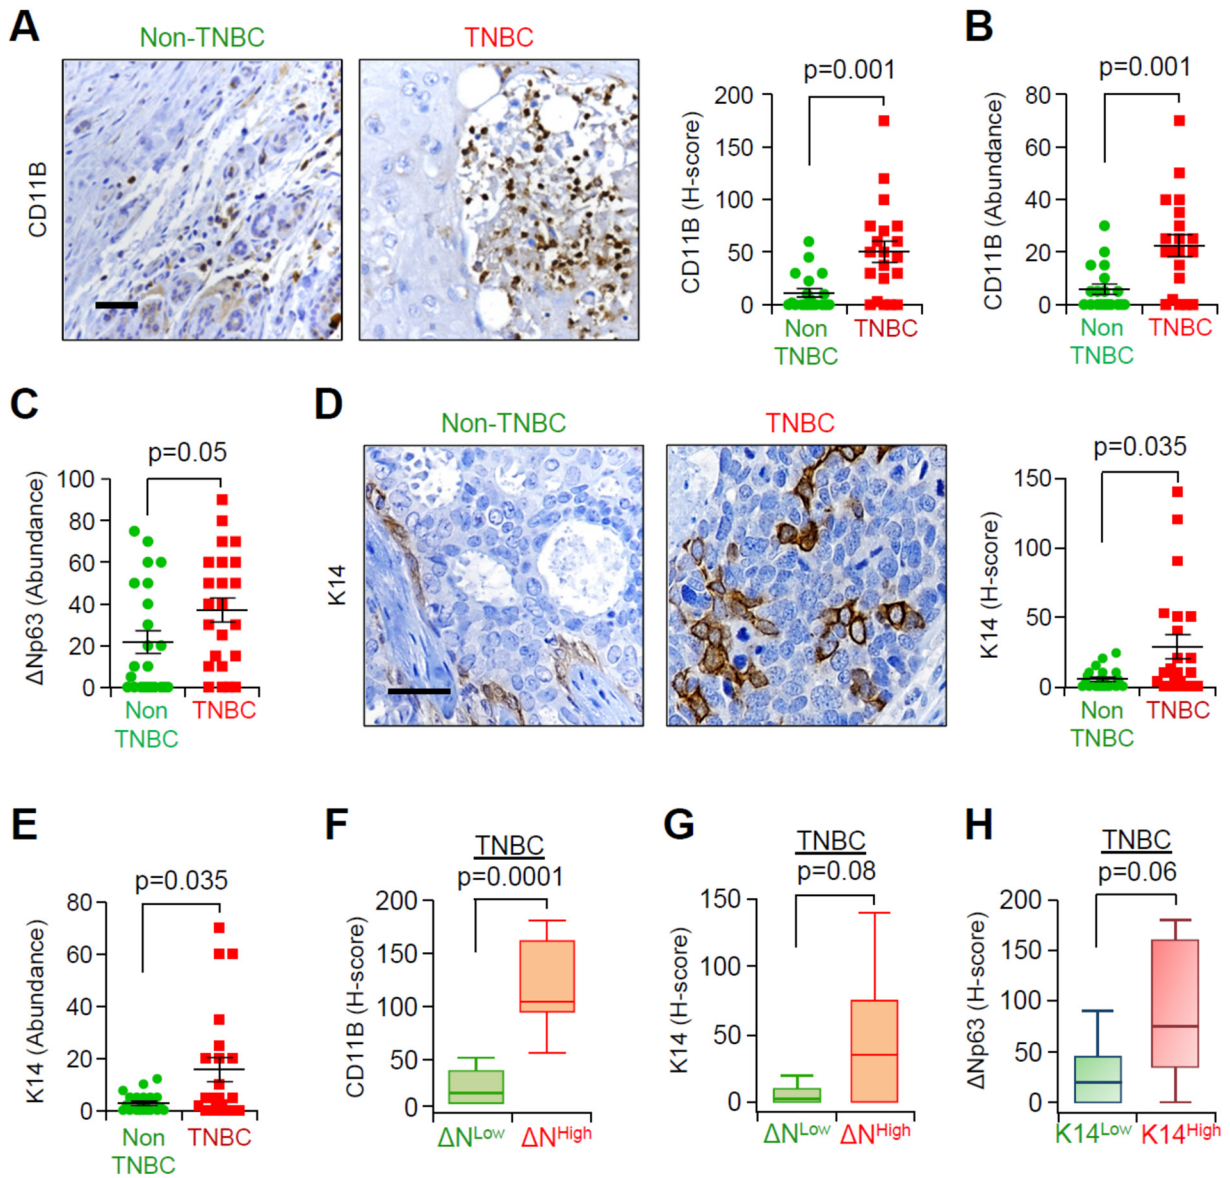

**Supplemental Figure 1. Basal subset of TNBC represents higher CD11B<sup>+</sup> cells infiltration in breast cancer.** (A-B) Representative immunohistochemistry (IHC) images (A, left) and calculated H-score (A, right) and abundance (B) for CD11B<sup>+</sup> cells in patient tissues. (C) Abundance of  $\Delta$ Np63<sup>+</sup> cells in patient tissues. (D) Representative IHC images (D, left) and

calculated H-score (**D**, right) and abundance (**E**) for K14 expression in patient tissues. (**A-E**) Non-TNBC n=21 patient samples, TNBC n=22 patient samples. The H-score value is the product of abundance of cells expressing respective protein (scale of 0-100) multiplied by the intensity of expression of that protein (scale of 0-3) (H-score= Abundance multiplied with Intensity). (**F**) Box plot is showing higher expression of CD11B in  $\Delta Np63$ -high ( $\Delta N^{high}$ ) than  $\Delta Np63$ -low ( $\Delta N^{low}$ ) human TNBC tissues. (**G**) Box plot is showing higher expression of K14 in  $\Delta Np63$ -high ( $\Delta N^{high}$ ) than  $\Delta Np63$ -low ( $\Delta N^{low}$ ) human TNBC tumor samples.  $\Delta N^{high}$  and  $\Delta N^{low}$  patients were stratified based on being above or below the median of  $\Delta Np63$  H-score in (main Figure, **1C**). (**H**) Box plot is showing  $\Delta Np63$  H-score in TNBC patient samples, which are stratified as  $K14^{high}$  and  $K14^{low}$  tissues by being above or below (respectively) median of K14 abundance. (**F-H**) n=22 TNBC patient samples. Scale bars, 40 $\mu$ m (**A-C**). (**A-C**) Mann-Whitney *U* test was used for scatter dot plots to calculate p-values.

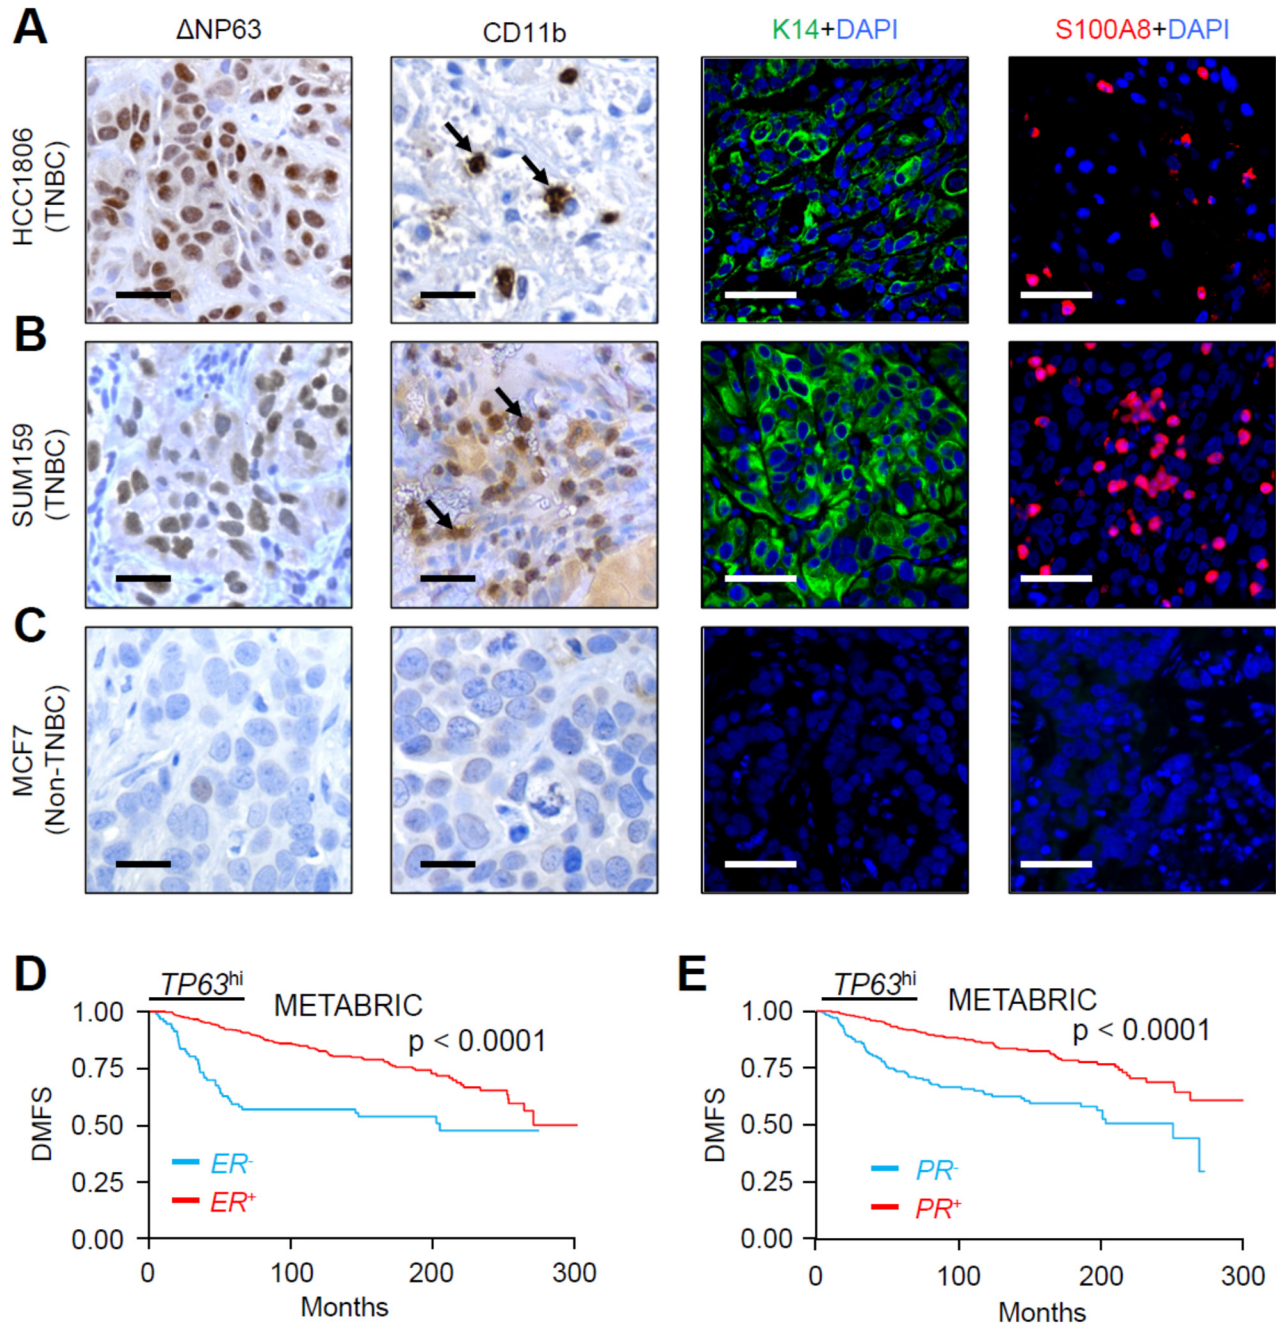

**Supplemental Figure 2. TNBC cell line xenograft tumors have higher basal markers and CD11b<sup>+</sup> cells infiltration.**

(A-C) Representative IHC/IF images of TNBCs (HCC1806, SUM159) and non-TNBC (MCF7) xenograft tumors are showing increased  $\Delta$ Np63<sup>+</sup> cells, CD11B<sup>+</sup> cells (black arrows), K14<sup>+</sup> cells and S100A8<sup>+</sup> cells in TNBCs compared to non-TNBCs (from left to right). (D and E)

Kaplan-Meier plot show that ER<sup>-</sup> patients and PR<sup>-</sup> patients have very poor prognosis ( $p < 0.0001$ ) in p63-high patients (p63 expression was stratified into upper and lower quartile in patient samples). Published METABRIC dataset was used (1). Scale bars, 40 $\mu$ m (**A-C**). (**D** and **E**) Log-Rank test was used to compute  $p$ -values.

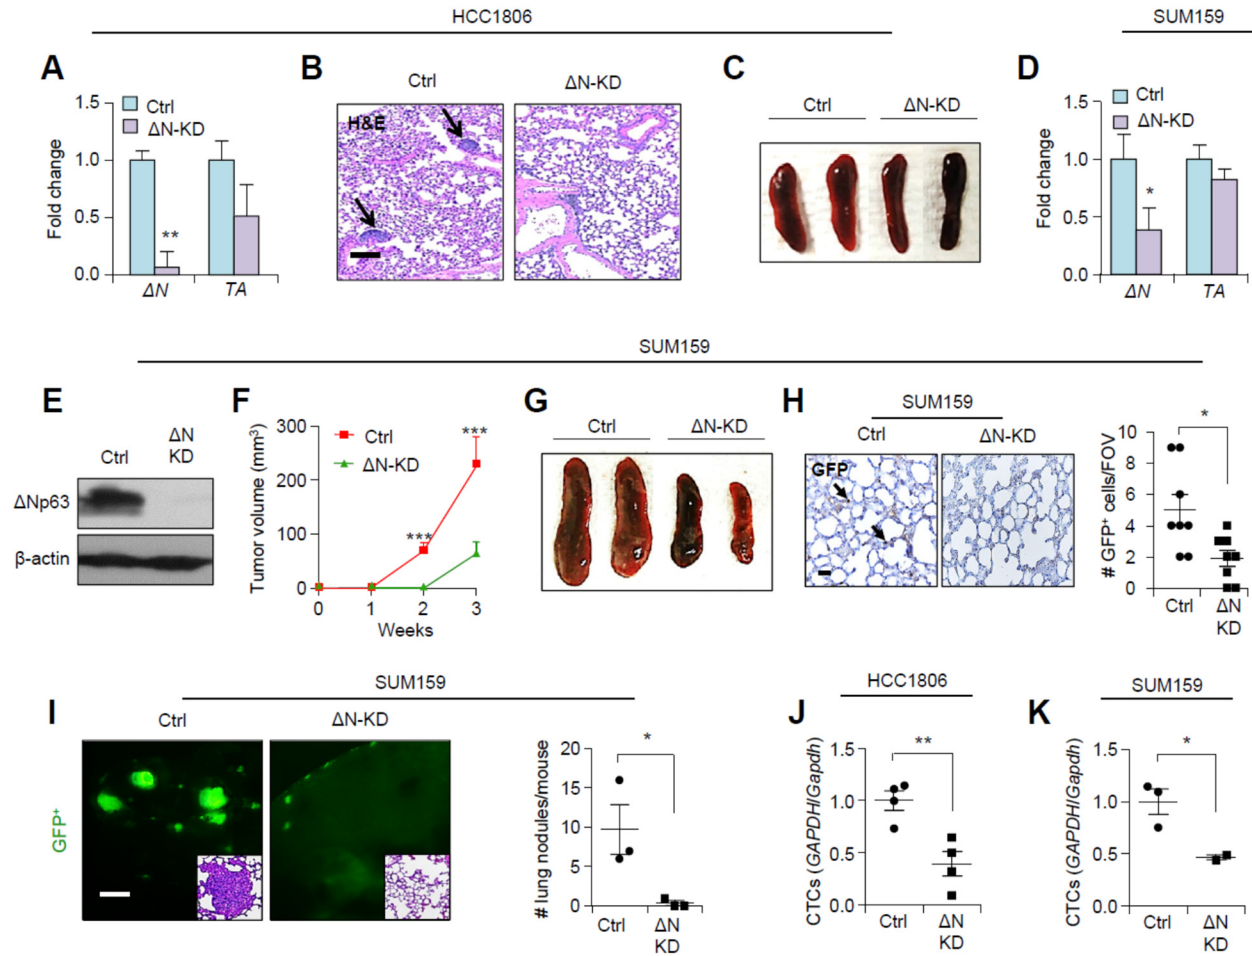

### Supplemental Figure 3. $\Delta Np63$ promotes tumor growth and metastasis in human TNBC.

(A) qRT-PCR analysis of  $\Delta Np63$  and  $TAp63$  mRNA expression in HCC1806 cells. (B) Representative H&E images are showing lung metastatic nodules (black arrows) in  $\Delta Np63$ -KD HCC1806 xenograft tumor bearing mice compared to control. n=5 mice/group. (C) Representative spleen images of tumor bearing mice, n= 5 mice/group. (D-E) qRT-PCR and western blot analysis of  $\Delta Np63$  and  $TAp63$  mRNA expression in SUM159 cells. (F) Tumor growth curve of GFP expressing control and  $\Delta Np63$ -KD SUM159 cells.  $5 \times 10^5$  were injected/mammary gland. Ctrl n=7 mice and  $\Delta N$ -KD n=6 mice. (G) Representative spleen images from tumor bearing mice, n=4 mice/group. (H) IHC image showing GFP<sup>+</sup> metastatic clusters and quantification in lungs of SUM159 xenograft tumor is shown in (right). n=4

mice/group. Multiple FOV/ lung was considered. (I) Fluorescence images are showing GFP<sup>+</sup> metastatic nodules (left) and quantification of metastasis in lungs of mice of resected SUM159 xenograft tumor in (right). Inset shows H&E images of sections of lung showing metastatic nodule in control only. n=3 mice/group. (J-K) Bar graph showing CTCs in mice injected with indicated group of HCC1806 cells (J) and SUM159 (K). CTC was calculated by semi-quantitative PCR of genomic DNA from peripheral blood using human *GAPDH* normalized with mouse *Gapdh*. All Real-time PCR values were normalized to the housekeeping gene *GAPDH*. Experiments were performed three times, each with qRT-PCR in technical duplicate, and data presented as the mean  $\pm$  SD. Scale bars, 40 $\mu$ m (B, H), and 200 $\mu$ m (I). Data are presented as the mean  $\pm$  SD in (A, D) and as the mean  $\pm$  SEM in (F, H-K). \* $p$ <0.05, \*\* $p$ <0.01 and \*\*\* $p$ <0.001. FOV; Field of view. (F) 2-way ANOVA test was performed with Bonferroni post-test adjustment. (A, D, J, K) Student's *t*-test was used. (H) Mann-Whitney *U* test was used.

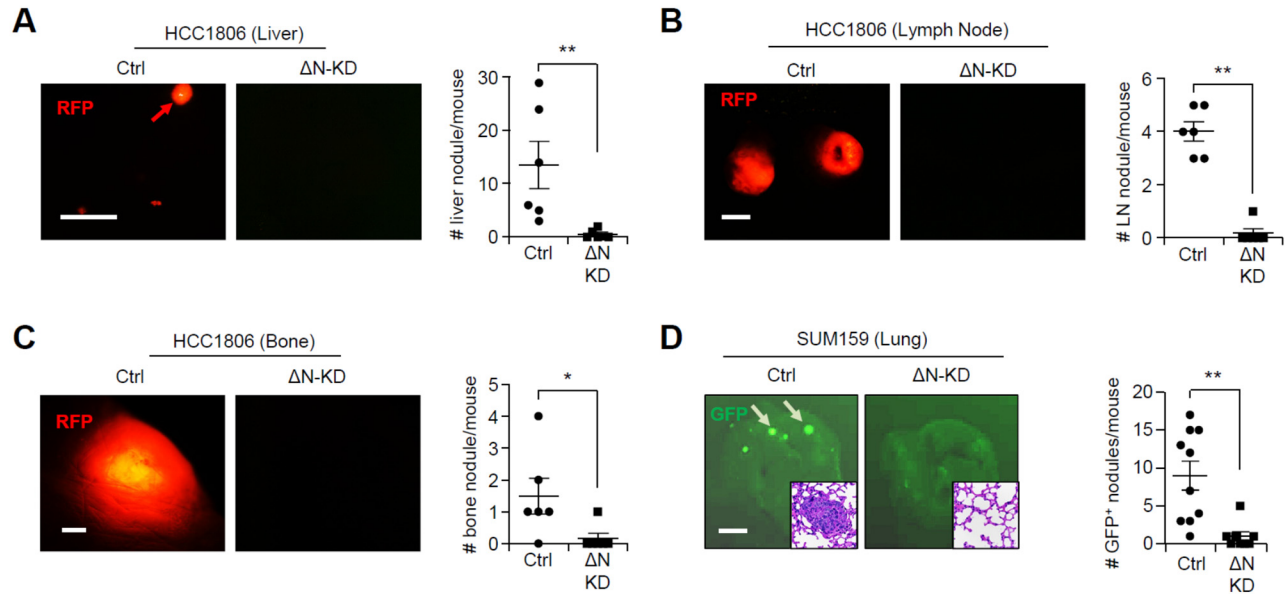

**Supplemental Figure 4.  $\Delta$ Np63 promotes metastasis in human TNBC.** (A) Representative images of liver (A), lymph node (LN) (B), knee area of bone (C) are showing RFP<sup>+</sup> metastatic nodules of indicated groups. Bar graphs (A-C) represent the quantification of nodules in each metastatic site. Red arrow shows metastatic nodule in liver in A. (D) SUM159 cells ( $2 \times 10^5$ ) were injected into bloodstream of NSG mice via tail vein to study metastasis and representative image of GFP<sup>+</sup> nodules in lung of indicated groups (left), which is quantified in (right). White arrows show GFP<sup>+</sup> metastatic nodules in lung of mice injected with control cells only. Inset shows H&E image of lung metastatic nodule. n is indicated in scatter plots for different groups. (A-C) n=6 mice/group. Scale bar, 500 $\mu$ m (A-D). Data are presented as the mean  $\pm$  SEM. \* $p < 0.05$  and \*\* $p < 0.01$ . (A-D) Mann-Whitney *U* test was used to calculate *p*-values.

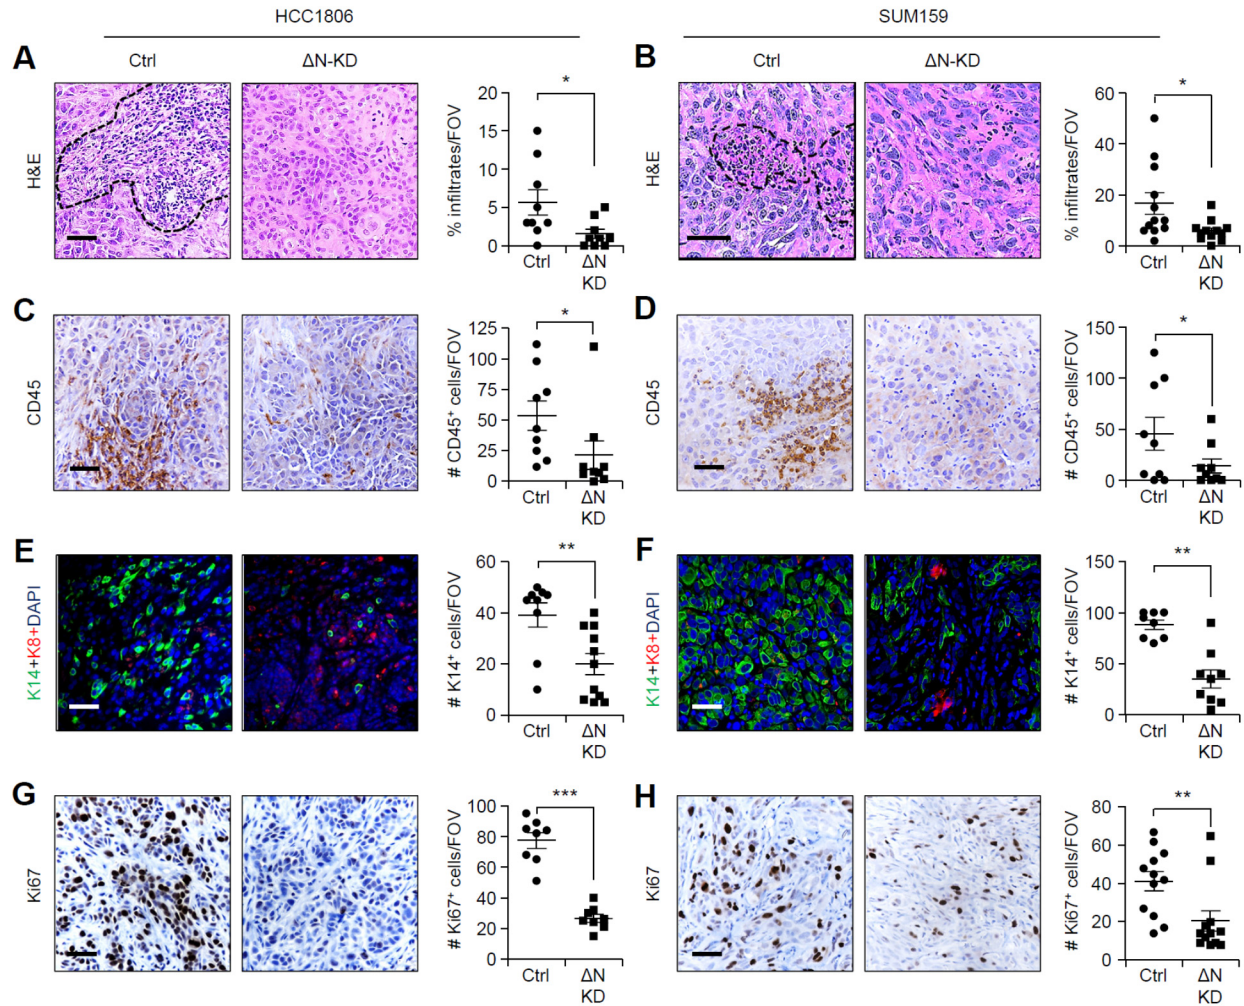

**Supplemental Figure 5. Loss of  $\Delta$ Np63 leads to dramatic alteration of tumor cell fate, reduced proliferation and immune infiltrate in TNBC.** (A and B) Representative H&E images are showing immune cell infiltration in control and  $\Delta$ Np63-KD HCC1806 (A) and SUM159 (B) primary tumors. (C and D) Representative IHC images are showing leukocytes marked by CD45 antibody in control and  $\Delta$ Np63-KD HCC1806 (C) and SUM159 (D) primary tumors. (E and F) Representative IF images are showing the expression of luminal (K8) and basal (K14) markers are depicting cell fate change in  $\Delta$ Np63-KD HCC1806 (E) and SUM159 (F) primary tumors compared to control. (G and H) Representative IHC images are showing the expression of cell proliferation (Ki67) in control and  $\Delta$ Np63-KD HCC1806 (G) and



SUM159 (**H**) primary tumors. Bar graph on the right of each image represents respective quantification values. (**A-C, F-G**) Mann-Whitney *U* test and (**D, E, H**) Student's *t*-test was used to compute *p*-values. Scale bars, 40 $\mu$ m (**A-H**). \**p*<0.05, \*\**p*<0.01 and \*\*\**p*<0.001. (**A-H**) n=6 samples were used and several random fields/sample were evaluated for quantification from 3 independent experiments. FOV; field of view. Bar graphs show data from 3 independent experiments and data presented as the mean  $\pm$  SEM.

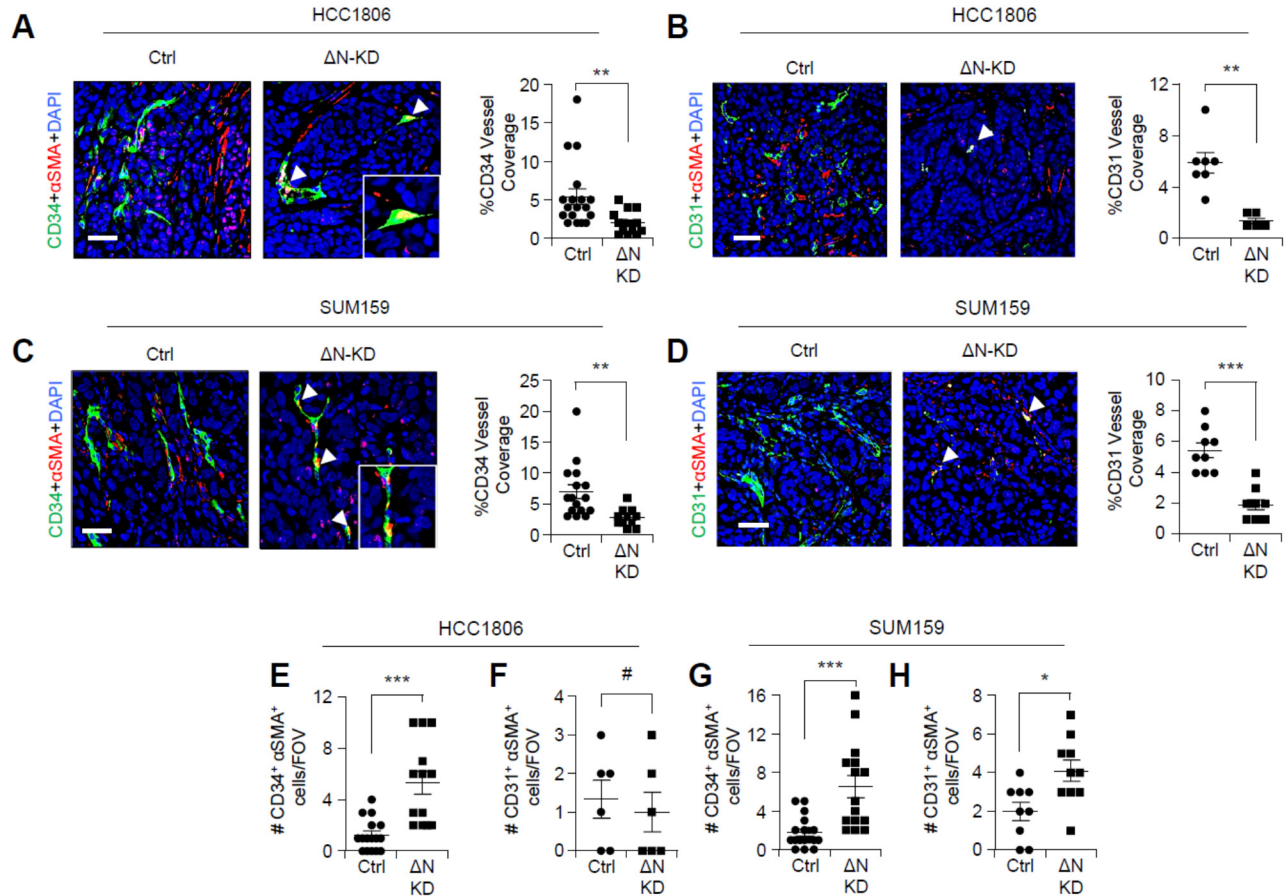

**Supplemental Figure 6. Loss of ΔNp63 leads to reduce tumor angiogenesis in TNBC.**

(A-D) Representative IF images are showing angiogenesis markers such as CD34 and αSMA or CD31 and αSMA in control and ΔNp63-KD HCC1806 (A and B) and SUM159 (C and D) primary tumors. MVD (microvascular density) was evaluated in tumors of indicated groups. For MVD, CD34<sup>+</sup> or CD31<sup>+</sup> blood vessel coverage were evaluated (A-D, right). (E-H) Microvascular integrity (MVI) was measured in control and ΔNp63-KD HCC1806 and SUM159 tumors using combination of CD34<sup>+</sup>SMA<sup>+</sup> or CD31<sup>+</sup>SMA<sup>+</sup> markers. For MVI, CD34<sup>+</sup>SMA<sup>+</sup> and CD31<sup>+</sup>SMA<sup>+</sup> double-stained cells were evaluated. (A-H) Student's *t*-test was used to compute *p*-values. Scale bars, 40μm (A-D). \**p*<0.05, \*\**p*<0.01, \*\*\**p*<0.001 and # = non-significant. n=4 samples were used and several random fields/sample were

evaluated for quantification from 3 independent experiments. Data presented as the mean  $\pm$  SEM.

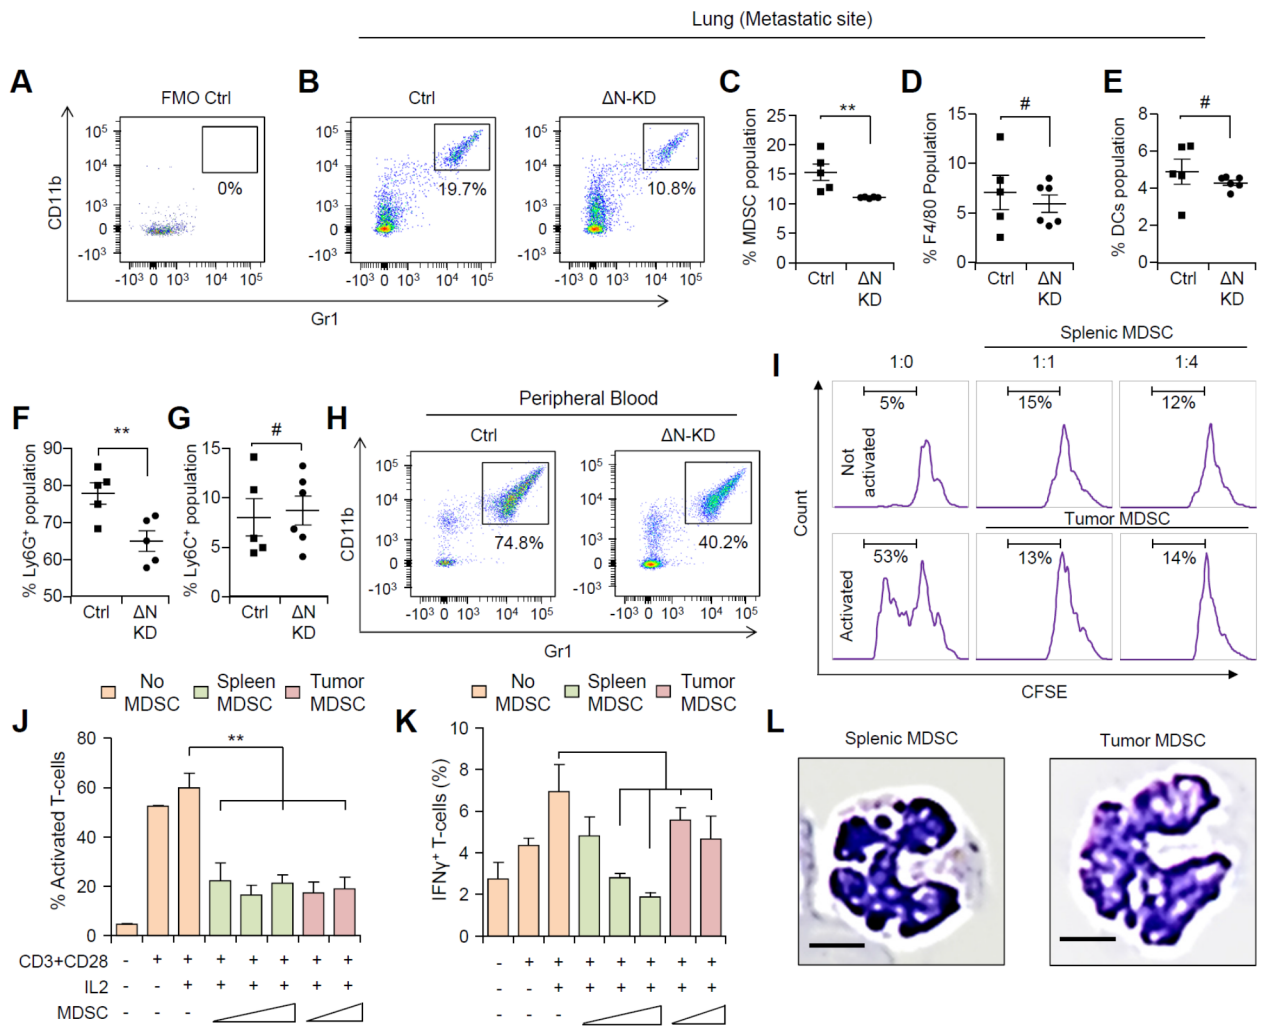

**Supplemental Figure 7.  $\Delta$ Np63 recruits tumor-induced PMN-MDSCs at metastatic site.**

(A) FMO control figure 3. FMO, Fluorescence Minus One control. (B) Flow profile of MDSCs in lungs of tumor bearing mice, based on the staining of CD45, CD11b and Gr1 markers. (C-E) Flow cytometric analysis of lungs of tumor bearing mice injected with control and  $\Delta$ Np63-KD HCC1806 cells depicting CD45<sup>+</sup> tumor populations is showing percentage of (C) MDSCs (CD11b<sup>+</sup> Gr1<sup>+</sup> F4/80<sup>-</sup>), (D) macrophages (F4/80<sup>+</sup>), (E) DCs (CD11c<sup>+</sup>). (F, G) Flow cytometric analysis is depicting MDSC sub-populations (F) PMN-MDSCs (CD45<sup>+</sup>CD11b<sup>+</sup>Ly6G<sup>+</sup> Ly6C<sup>low</sup>) and (G) M-MDSCs (CD45<sup>+</sup>CD11b<sup>+</sup>Ly6C<sup>high</sup>) in the lung of tumor bearing mice of

indicated groups. N is indicated in scatter plots of indicated groups for **(C-G)**. **(H)** Flow profile of MDSC population of peripheral blood of mice injected with control and  $\Delta$ Np63-KD HCC1806 cells. **(I, J)** CFSE-labeled splenocytes stimulated with anti-CD3, anti-CD28 monoclonal antibodies along with IL-2 treatment were co-cultured with MDSCs. MDSCs were either isolated from tumor or spleen of tumor bearing mice. Splenocytes were harvested from normal mice of same age (2). The cells were harvested and analyzed after 3-4 days using flow cytometry. CFSE dilution demonstrated that the proliferation of T-cells was inhibited by MDSCs **(I)**, which is quantified **(J)**. **(K)** The quantification of IFN- $\gamma$ <sup>+</sup> splenocytes using flow cytometry analysis is showing inhibitory effects of MDSCs in a dose-dependent manner (1:2, 1:4 and 1:8 ratios were tested). **(I-K)** n=3 independent experiments performed in technical duplicate. Bar graphs show data presented as the mean  $\pm$  SEM. **(L)** MDSCs after Giemsa staining. The MDSCs were isolated from primary mammary tumor or spleen of tumor-bearing mice. Scale bars, 5 $\mu$ m **(L)**. Data are presented as the mean  $\pm$  SEM. \* $p$ <0.05, \*\* $p$ <0.01 and #= non-significant. **(C-G)** Mann Whitney  $U$  test was used. **(J, K)** 1-way ANOVA with Tukey's post hoc test was used.

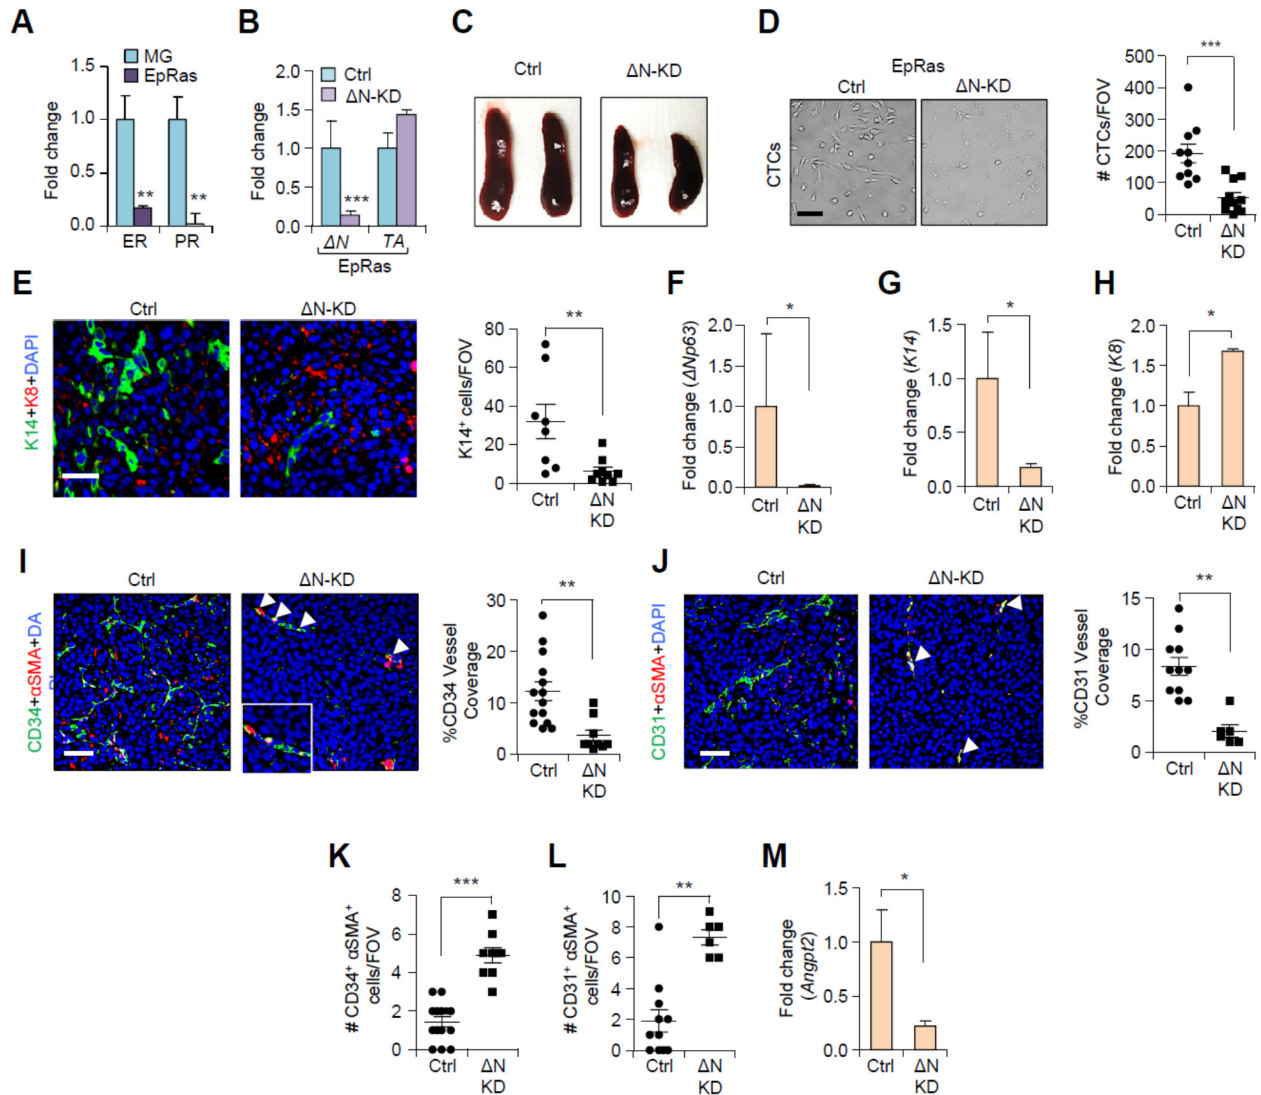

**Supplemental Figure 8. Loss of  $\Delta Np63$  in mouse TNBC leads to reduced CTCs, cell fate and angiogenesis. (A, B)** qRT-PCR analysis of Estrogen Receptor (*ER*), Progesterone Receptor (*PR*),  $\Delta Np63$  and *TAp63* mRNA expression in EpRas mouse TNBC cells. **(C)** Representative spleen images of tumor bearing mice of indicated groups, n=4 mice/group. **(D)** Images are showing circulating tumor cells (CTCs) from control and  $\Delta Np63$ -KD EpRas xenograft bearing mice. Quantification is in right, n=4 mice/group. **(E)** Representative IF images are showing the expression of luminal (K8) and basal (K14) markers in tumors of indicated groups. Bar graph (right) represents quantification. **(F-H)** qRT-PCR data is showing

mRNA levels of  $\Delta$ Np63 (**F**), cell fate markers K14 (**G**) and K8 (**H**) in control and  $\Delta$ Np63-KD EpRas tumors. (**I-J**) Representative IF images showing angiogenesis markers such as CD34 and  $\alpha$ SMA (**I**) or CD31 and  $\alpha$ SMA (**J**) in control and  $\Delta$ Np63-KD EpRas primary tumors. For MVD, CD34<sup>+</sup> or CD31<sup>+</sup> blood vessel coverage were evaluated of indicated groups (**I-J**, right). (**K-L**) For MVI, CD34<sup>+</sup>SMA<sup>+</sup> and CD31<sup>+</sup>SMA<sup>+</sup> double-stained cells were evaluated. White arrowheads show double positive CD31<sup>+</sup> SMA<sup>+</sup> (yellow) cells in  $\Delta$ Np63-KD tumors. n=4 samples were used and several random fields/sample were evaluated. Bar graphs show data from 3 independent experiments. (**M**) qRT-PCR data is showing mRNA levels of Angiopoietin2 (Angpt2) in indicated tumors. (**A, B, F-H and M**) All Real-time PCR values were normalized to the housekeeping gene *Gapdh*. Experiments were performed three times, each with qRT-PCR in technical duplicate, and data presented as the mean  $\pm$  SD. (**F-H, M**) n=4 tumors/group. Bar graph on the right of each image represents the quantifications. (**A, B, D, E, H-L**) Student's *t*-test and (**F-G, M**) Mann-Whitney *U* test was used. Scale bar, 40 $\mu$ m (**D, E, I and J**). Data are presented as the mean  $\pm$  SEM. \**p*<0.05, \*\**p*<0.01 and \*\*\**p*<0.001.

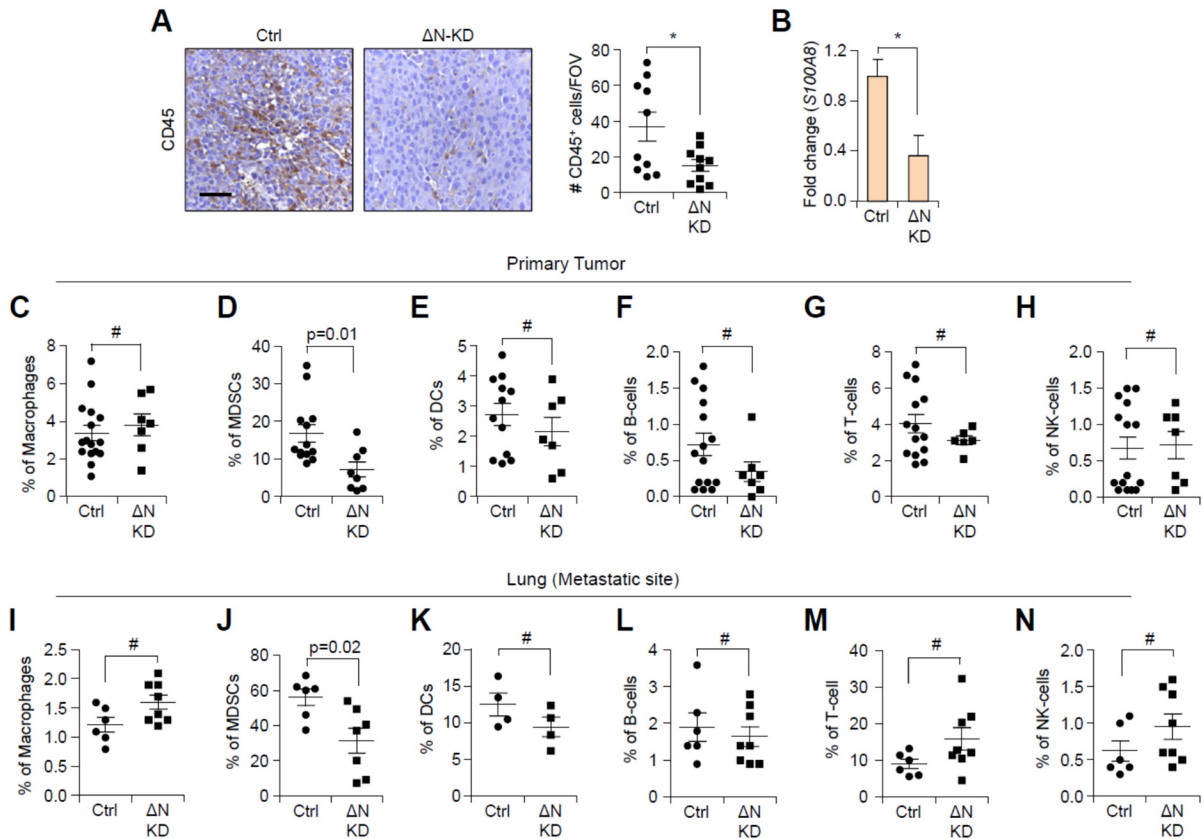

**Supplemental Figure 9. Loss of  $\Delta$ Np63 in mouse TNBC leads to reduced PMN-MDSC**

**infiltration in primary tumor and metastatic lungs. (A)** Representative IHC images of

primary tumors are showing leukocytes infiltration marked by CD45 antibody from control

and  $\Delta$ Np63-KD EpRas tumors. Quantification is shown in the right panel. n=3 samples were

used and several random fields/sample were evaluated for quantification. Bar graphs show

data from 3 independent experiments and data presented as the mean  $\pm$  SEM. **(B)** qRT-PCR

analysis is showing mRNA levels of S100A8 in control and  $\Delta$ Np63-KD EpRas tumors are

showing reduced S100A8 mRNA in  $\Delta$ Np63-KD tumors compared to control. n=4

samples/group. Real-time PCR values were normalized to the housekeeping gene *Gapdh*.

Experiments were performed three times, each with qRT-PCR in technical duplicate, and

data presented as the mean  $\pm$  SD. **(C-H)** Flow cytometric analysis is depicting percentage



of **(C)** Macrophages (CD45<sup>+</sup>F4/80<sup>+</sup>), **(D)** MDSCs (CD45<sup>+</sup>CD11b<sup>+</sup>Gr1<sup>+</sup>F4/80<sup>-</sup>), **(E)** dendritic cells (DCs; CD45<sup>+</sup>CD11c<sup>+</sup>), **(F)** B-cells (CD45<sup>+</sup>CD19<sup>+</sup>), **(G)** T-cells (CD45<sup>+</sup>CD3<sup>+</sup>) and **(H)** NK-cells (CD45<sup>+</sup>CD49b<sup>+</sup>) in EpRas-derived primary tumors grown in BALB/c mice. **(I-N)** Flow cytometric analysis is depicting percentage of **(I)** Macrophages (CD45<sup>+</sup>F4/80<sup>+</sup>), **(J)** MDSCs (CD45<sup>+</sup>CD11b<sup>+</sup>Gr1<sup>+</sup>F4/80<sup>-</sup>), **(K)** dendritic cells (DCs; CD45<sup>+</sup>CD11c<sup>+</sup>), **(L)** B-cells (CD45<sup>+</sup>CD19<sup>+</sup>), **(M)** T-cells (CD45<sup>+</sup>CD3<sup>+</sup>) and **(N)** NK-cells (CD45<sup>+</sup>CD49b<sup>+</sup>) in the lungs of EpRas tumor bearing BALB/c mice. n is indicated in scatter plots for different groups **(C-N)**. **(A-N)** Mann-Whitney *U* test was used to compute *p*-value. Scale bar, 40μm **(A)**. Data are presented as the mean ± SEM. \**p*<0.05 and #= non-significant. FOV; field of view.

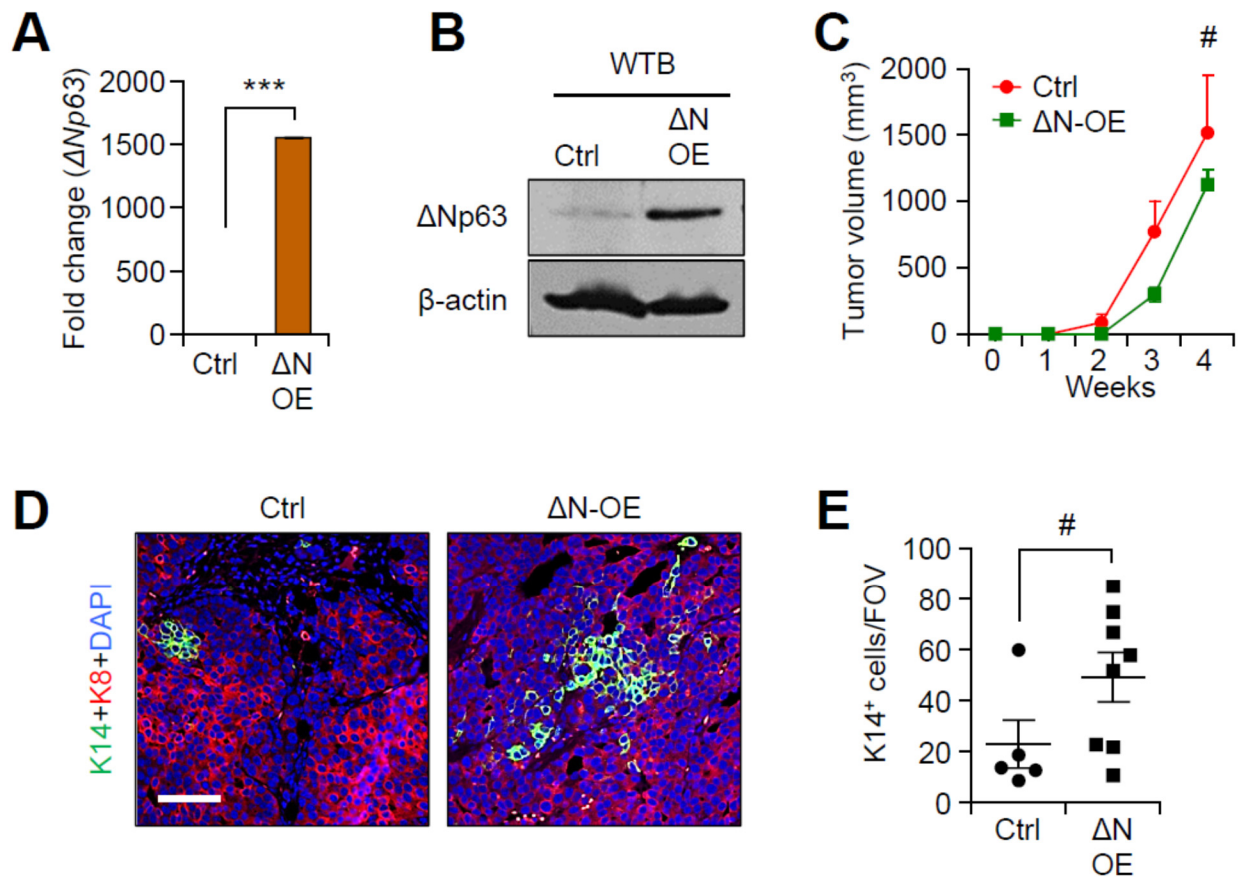

**Supplemental Figure 10. Overexpression of  $\Delta Np63$  alters cell fate but not tumor growth in non-TNBC tumors.** (A) qRT-PCR and (B) western blot are showing  $\Delta Np63$  ( $\Delta N$ ) mRNA and protein levels in WTB luminal cells (non-TNBC) after lentivirus-mediated overexpression (OE) of  $\Delta Np63$ . Real-time PCR values were normalized to the housekeeping gene *Gapdh*. Experiments were performed three times, each with qRT-PCR in technical duplicate, and data presented as the mean  $\pm$  SD. (C) Tumor growth curves in mice injected with control and  $\Delta Np63$ -OE WTB cells. Briefly, ( $2 \times 10^5$ ) were injected into mammary fat pad (MFP) of FVB mice and tumor were palpated for indicated time periods.  $n=6$  tumors/group. (D, E) Representative IF images are showing increased expression of basal (K14) marker are depicting cell fate change in  $\Delta Np63$ -OE WTB primary tumors compared to control.  $n=3$  samples were used and several random fields/sample were evaluated for quantification. Bar

graph (**E**) represents quantification and data is presented as the mean  $\pm$  SEM. (**A**, **E**) Mann-Whitney *U* test was used to compute p-values. (**C**) 2-way ANOVA was performed with a Bonferroni post-correction to compute statistical significance of tumor growth. Scale bar, 80 $\mu$ m (**D**). Data are presented as the mean  $\pm$  SD for (**A**) and data are presented as the mean  $\pm$  SEM for (**C**, **E**). \*\*\*p<0.001 and # = non-significant. FOV; field of view.

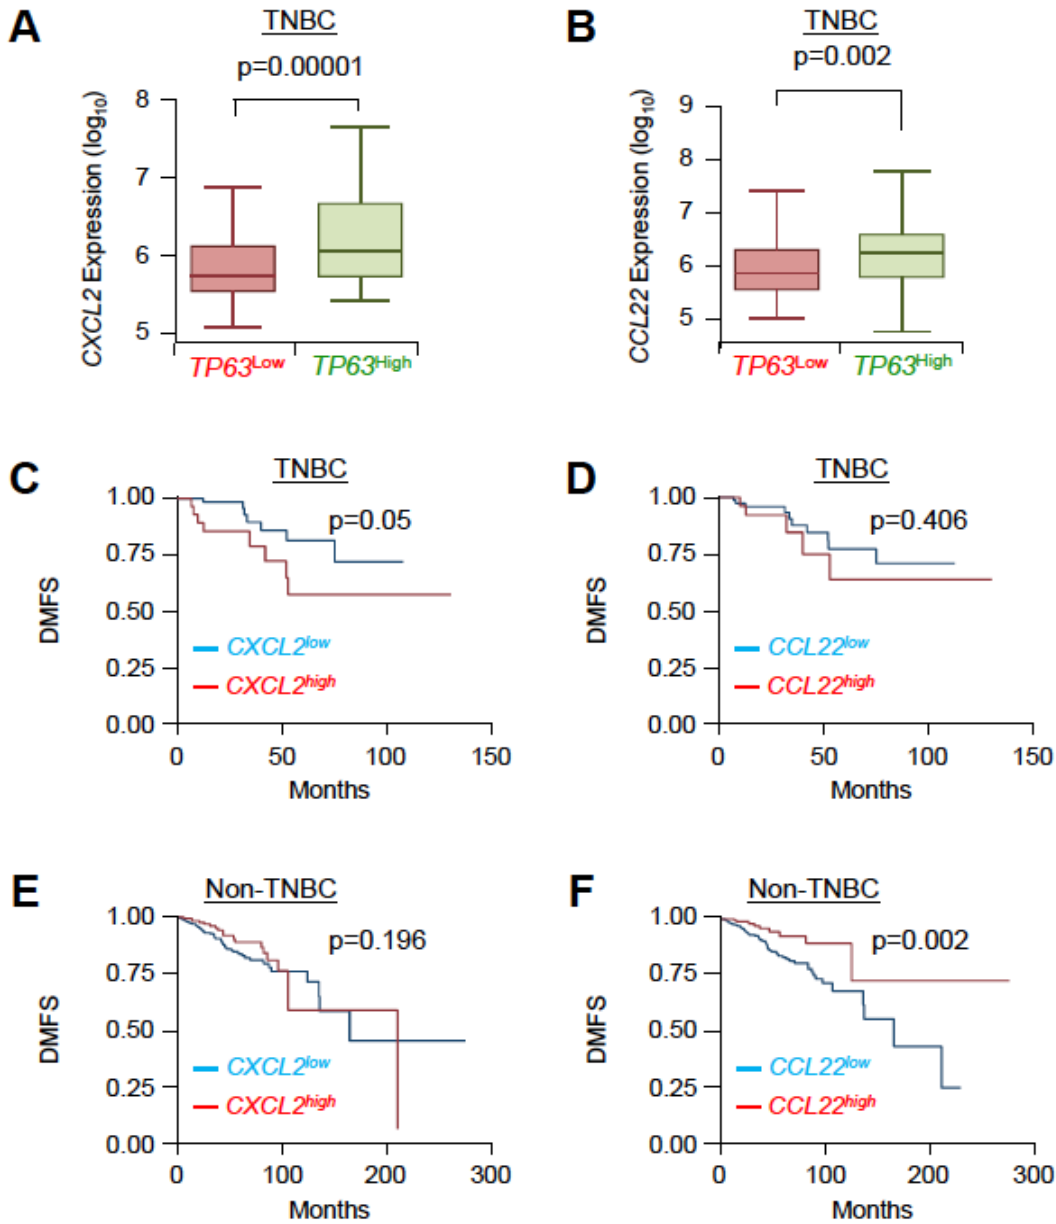

**Supplemental Figure 11. TNBC patient tumors express higher *CXCL2* and *CCL2* and this high expression of *CXCL2* and *CCL22* is associated with poor distant metastasis-free survival of patients. (A, B) Box plots are showing positive correlation between *TP63* and *CXCL2* (A) and *CCL22* (B) respectively in ER-PR-HER2-TNBC subsets. (C, D) High *CXCL2* and *CCL22* correlate with poor distant metastasis-free survival (DMFS) in TNBC**

patients. **(E-F)** On the contrary, high *CXCL2* and *CCL22* correlates with better DMFS in non-TNBC patients. TCGA dataset was used for clinical dataset analysis (3). **(A, B)** Mann-Whitney *U* test was used to compute *p*-value. **(C-F)** Log-Rank test was used for KM plots to calculate *p*-values.

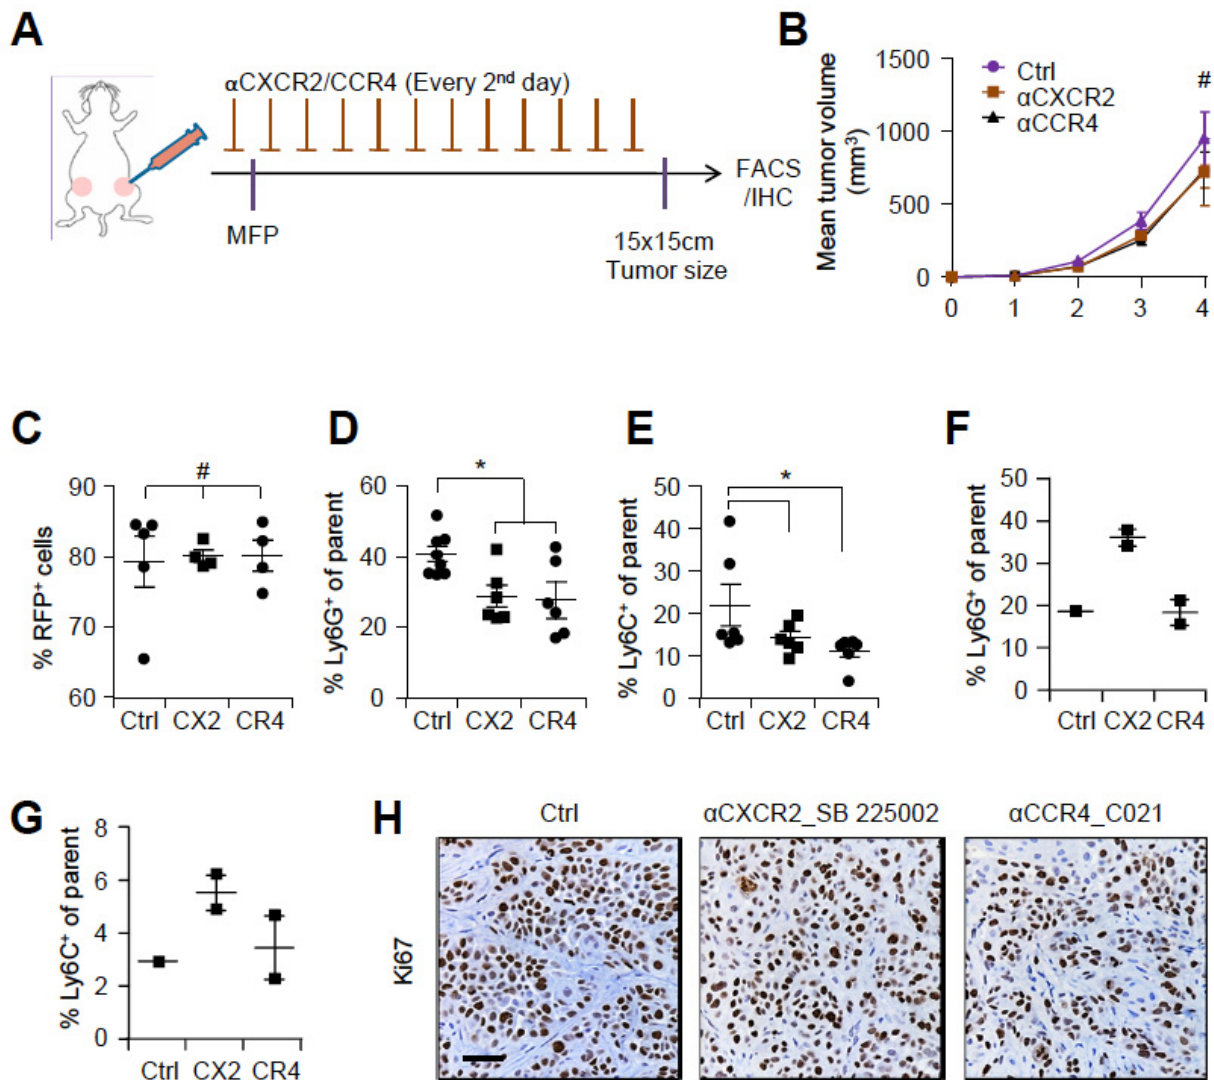

**Supplemental Figure 12. Blockade of MDSC recruitment does not alter primary tumor growth.** (A) Schematic describing the experimental strategy for blocking chemokine receptors in spontaneous metastasis model. Mice were pre-treated with chemokine blockers 2 days before injection of tumor cells and treatment continued every 2<sup>nd</sup> day. (B) HCC1806 tumor cells ( $2 \times 10^5$ ) were injected into mammary fat pad of Nude mice are showing tumor growth curve upon blocking of indicated chemokine receptors. Ctrl n=8 mice tumors, CXCR2 inhibitor n=4 mice tumors and CCR4 inhibitor n=4 mice tumors. (C-E) Flow cytometry analysis representing the percentage of PMN-MDSCs (Ly6G<sup>+</sup>) (C) M-MDSCs (Ly6C<sup>+</sup>) (D) and RFP<sup>+</sup>

tumor cells (**E**) in the primary tumor of HCC1806 cells upon indicated treatments. (**F** and **G**) Flow cytometric analysis is depicting Ly6G<sup>+</sup> and Ly6C<sup>+</sup> MDSCs in blood of tumor bearing mice of indicated groups. N is indicated in scatter plots for different groups. (**H**) IHC analysis of treated and untreated primary mammary tumors is showing no difference in Ki67<sup>+</sup> cells between indicated groups. n=3 samples were used and several random fields/sample were evaluated for quantification from 3 independent experiments. Scale bars, 40μm (**H**). Data are presented as the mean ± SEM. \* $p < 0.05$  and # = non-significant. (**B**) 2-way ANOVA with Bonferroni post-test was used to compute statistical significance for tumor growth curve data. (**C-E**) 1-way ANOVA was used with Tukey's post hoc test to compute  $p$ -values.

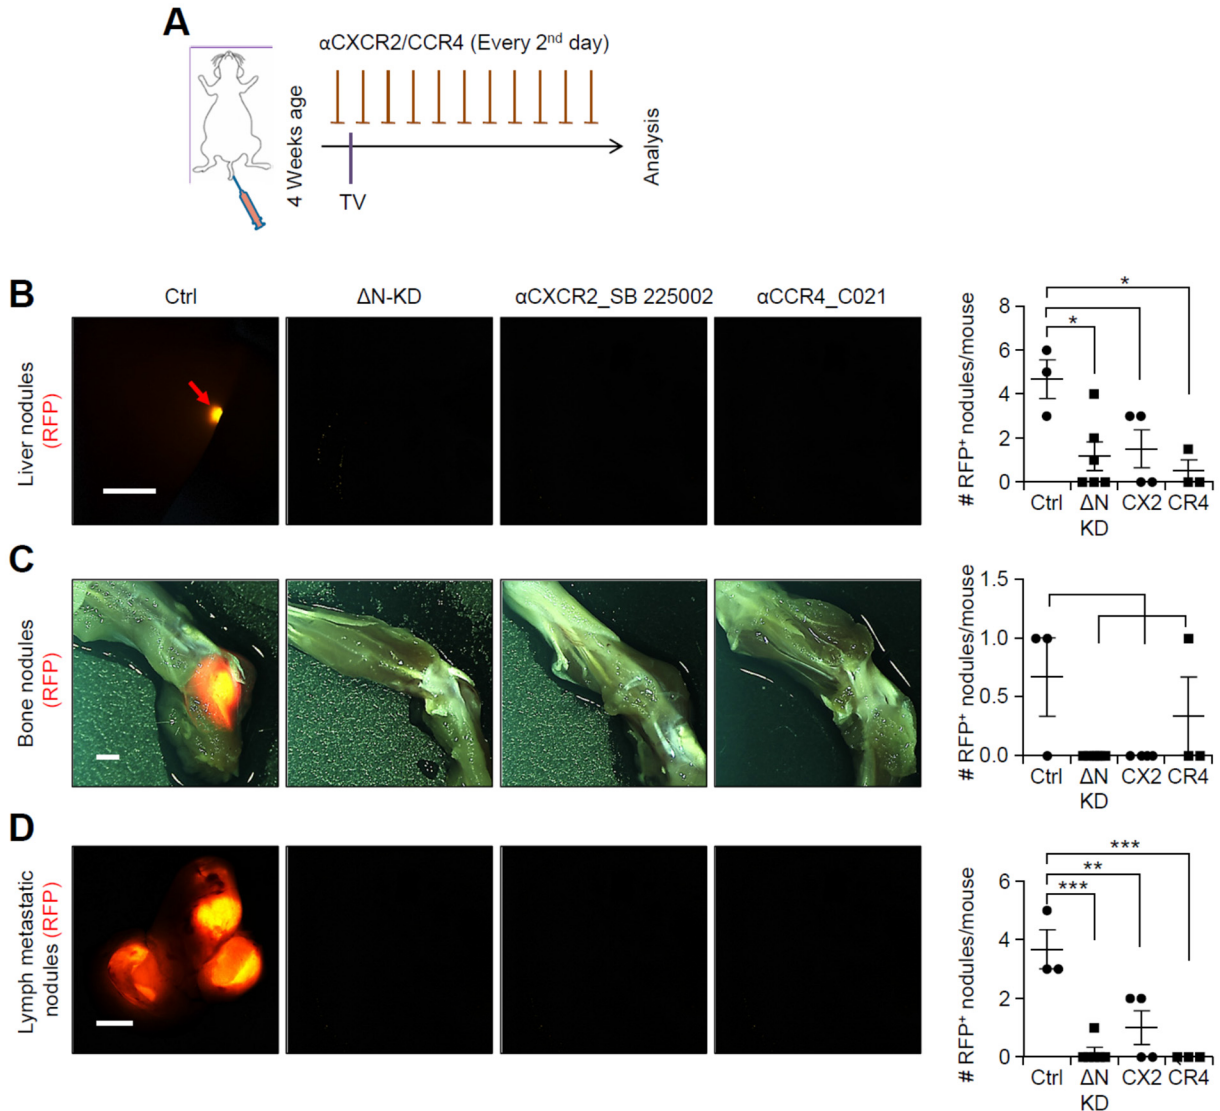

**Supplemental Figure 13. Blockade of MDSC recruitment significantly diminishes metastasis.** (A) Schematic describing the experimental strategy for blocking chemokine receptors in experimental metastasis model. Mice were pre-treated with chemokine blockers 2 days before injection of tumor cells and treatment continued every 2<sup>nd</sup> day. (B-D) RFP images of HCC1806 tumor cells in distal metastatic sites after cells were injected via tail vein to NSG mice. Mice were started on treatment with the CXCR2 or CCR4 inhibitors following schematic diagram in (A). Representative images are showing RFP<sup>+</sup> metastatic nodules (red arrow) in the liver (B), knee joint at bone (C) and lymph nodes (D). Scatter plots are showing



quantification of RFP<sup>+</sup> nodules in the respective organs (**B-D**). Ctrl n=4 mice, ΔN-KD n=6 mice, αCXCR2 n=4 mice and αCCR4 n=3 mice in (**B-D**). Scale bars, 200μm (**B**), 500μm (**C** and **D**). Data are presented as the mean ± SEM. 2 independent experiments were performed. \* $p < 0.05$ , \*\* $p < 0.01$  and \*\*\* $p < 0.001$ . (**B-D**) 1-way ANOVA was used with Tukey's post hoc test to compute  $p$ -values.

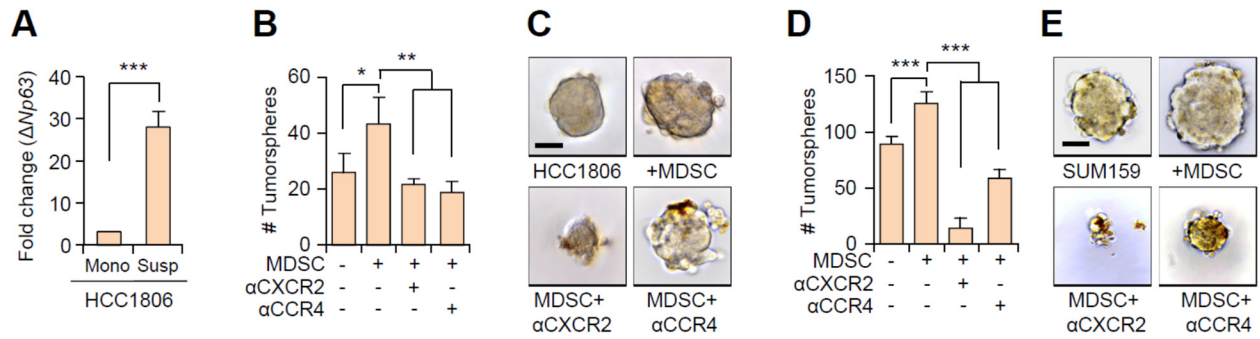

**Supplemental Figure 14.  $\Delta Np63$  is enriched in CSCs and reduced level of MDSCs decreases CSC function. (A)** qRT-PCR analysis of the expression of  $\Delta Np63$  in HCC1806 cells cultured in monolayer vs. in suspension. In suspension cultures enrich for stem cell activity in tumorspheres. Real-time PCR values were normalized to the housekeeping gene *GAPDH*. Experiments were performed three times, each with qRT-PCR in technical duplicate, and data presented as the mean  $\pm$  SD. Bar graphs are showing tumorspheres number **(B)** and representative images **(C)** of HCC1806 cells cultured for 3 days with indicated treatments.  $n=3$  independent experiments performed in technical duplicate. **(D and E)** Bar graphs are showing tumorspheres number **(D)** and representative images **(E)** of SUM159 cells cultured for 3 days with indicated treatments **(E)**  $n=3$  independent experiments performed in technical duplicate. Scale bars, 40 $\mu$ m **(C and E)**. Data are presented as the mean  $\pm$  SEM. \* $p<0.05$ , \*\* $p<0.01$  and \*\*\* $p<0.001$ . **(A)** Student's *t*-test was used to compute *p*-value. **(B, D)** 1-way ANOVA was used with Tukey's post hoc test to compute *p*-values.

**Fig. 2A**

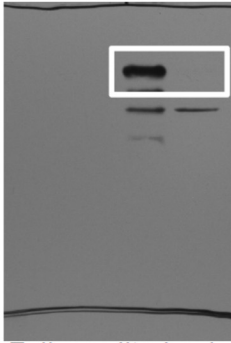

Full unedited gel  
for Figure 2A  
(Top lane)

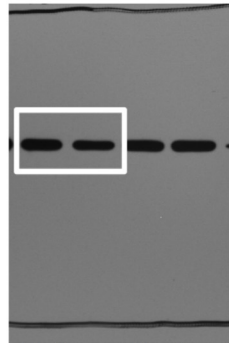

Full unedited gel  
for Figure 2A  
(Bottom lane)

**Supplemental Fig. 3E**

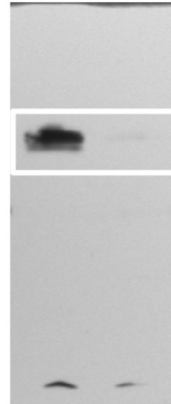

Full unedited gel  
for Supplemental  
Figure 3E (Top  
lane)

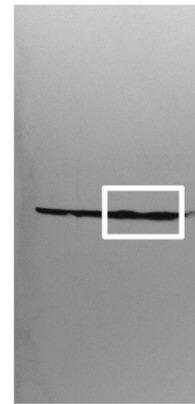

Full unedited gel  
for Supplemental  
Figure 3E  
(Bottom lane)

**Fig. 4A**

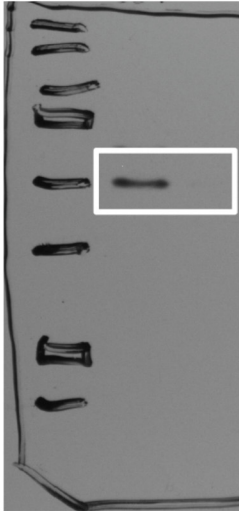

Full unedited gel  
for Figure 4A  
(Top lane)

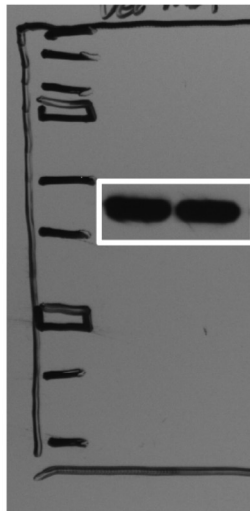

Full unedited gel  
for Figure 4A  
(Bottom lane)

**Supplemental Fig. 10B**

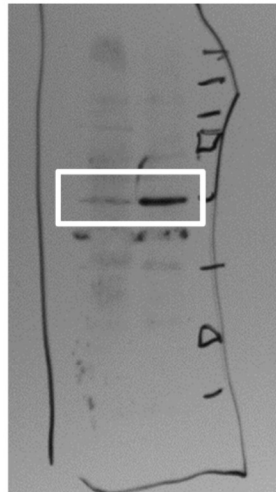

Full unedited gel for  
Supplemental Figure  
10B (Top lane)

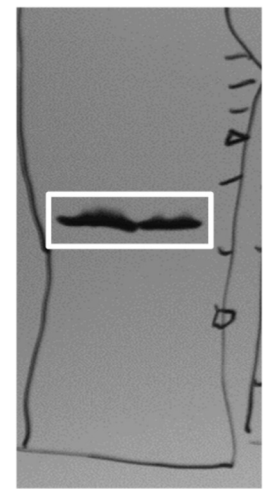

Full unedited gel for  
Supplemental Figure  
10B (Bottom lane)

**Supplemental Figure 15. Uncut gels of all western blot images.**

Supplemental Table 1: Antibody used for IHC, IF and Western blot

| <b>Antibody</b>   | <b>Catalog number</b> | <b>Dilution (application)</b>        | <b>Company</b>     |
|-------------------|-----------------------|--------------------------------------|--------------------|
| GFP               | ab13970               | 1:500 (IHC)                          | Abcam              |
| $\Delta$ Np63     | RR14 clone            | 1:75 (IHC), 1:1000<br>(Western Blot) | Romano et al, 2012 |
| $\beta$ -actin    | ab6276                | 1:10,000 (Western<br>Blot)           | Abcam              |
| K8                | TROMA-1s              | 1:25 (IF)                            | DSHB               |
| K14               | PRB155P               | 1:200 (IF)                           | Biologend          |
| Ki67              | Ki67-MM1-L-CE         | 1:50 (IHC)                           | Leica Microsystems |
| Cleaved-caspase-3 | 9661S                 | 1:100 (IHC)                          | Cell Signaling     |
| CD31              | ab28364               | 1:100 (IHC)                          | Abcam              |
| CD34              | ab81289               | 1:200 (IF)                           | Abcam              |
| $\alpha$ SMA      | ab7817                | 1:200 (IF)                           | Abcam              |
| S100A8            | MAB3059-SP            | 1:200 (IF)                           | R&D Systems        |
| S100A9            | ab92507               | 1:250 (IF)                           | Abcam              |
| CD33              | NCL-L-CD33            | 1:10 (IF)                            | Leica Microsystems |
| CD11B             | ab133357              | 1:1000 (IHC)                         | Abcam              |
| CD45              | 550539                | 1:12.5 (IHC)                         | BD Biosciences     |
| CD15              | 555400                | 1:200 (IF)                           | BD Biosciences     |
| LOX-1             | Ab126538              | 1:200 (IF)                           | Abcam              |

Supplemental Table 2: Antibody used for flow cytometry

| <b>Antibody</b> | <b>Fluorochrome</b> | <b>Dilution</b> | <b>Catalog number</b> | <b>Company</b> |
|-----------------|---------------------|-----------------|-----------------------|----------------|
| CD11c           | APC                 | 1:100           | #550261               | BD Biosciences |
| F4/80           | APC-Cy7             | 1:100           | #123118               | Biolegend      |
| CD45            | PE-Cy7              | 1:100           | #552848               | BD Biosciences |
| CD11b           | Per-CP-Cy5.5        | 1:100           | #550993               | BD Biosciences |
| Ly-6C           | APC                 | 1:100           | #560595               | BD Biosciences |
| Ly-6G           | FITC                | 1:100           | #551460               | BD Biosciences |
| CD45            | FITC                | 1:100           | #553080               | BD Biosciences |
| Gr1             | APC-Cy7             | 1:100           | #557661               | BD Biosciences |
| F4/80           | FITC                | 1:100           | #11-4801-81           | Invitrogen     |
| Ly6G            | V450                | 1:100           | #560603               | BD Biosciences |
| CD49b           | PE                  | 1:100           | #553858               | BD Biosciences |
| CD3e            | PerCP-Cy5.5         | 1:100           | #551163               | BD Biosciences |
| CD19            | APC                 | 1:100           | #550992               | BD Biosciences |

Supplemental Table 3: Primers (human and mouse genes) used in quantitative PCR

| <i>GENE</i>    | <i>FORWARD</i>                  | <i>REVERSE</i>                           |
|----------------|---------------------------------|------------------------------------------|
| <i>hΔNP63</i>  | GGAAAACAATGCCCAGACTC            | GTG GAA TAC GTC CAG GTG GC               |
| <i>hTAP63</i>  | AAGATG GTG CGA CAA ACA AG       | AGA GAG CAT CGA AGG TGG AG               |
| <i>hGAPDH</i>  | GGAGTCAACGGATTTGGTCGTA          | GGCAACAATATCCACTTTACCAGAGT               |
| <i>hCXCR2</i>  | TGG ATT TTT GGC ACA TTC C       | TGG GCT AAC ATT GGA TGA GT               |
| <i>hCCR4</i>   | AGA AGG CAT CAA GGC ATT TGG     | ACA CAT CAG TCA TGG ACC TGA G            |
| <i>hCXCL1</i>  | AGT CAT AGC CAC ACT CAA GAA TGG | GAT GCA GGA TTG AGG CAA GC               |
| <i>hCXCL2</i>  | CGC CCA AAC CGA AGT CAT AG      | AGA CAA GCT TTC TGC CCA TTC T            |
| <i>hCXCL3</i>  | TCC CCC ATG GTT CAG AAA ATC     | GGT GCT CCC CTT GTT CAG TAT CT           |
| <i>hCXCL6</i>  | AGA GCT GCG TTG CAC TTG TT      | GCA GTT TAC CAA TCG TTT TGG GG           |
| <i>hCXCL8</i>  | AGC TGG CCG TGG CTC TCT         | CTG ACA TCT AAG TTC TTT AGC ACT<br>CCT T |
| <i>hCXCL10</i> | GTG GCA TTC AAG GAG TAC CTC     | GCC TTC GAT TCT GGA TTC AGA CA           |
| <i>hCXCL11</i> | TTG GCT GTG ATA TTG TGT GCT     | GGA TTT AGG CAT CGT TGT CCT TT           |
| <i>hCXCL17</i> | TCC ATG GTC TCT AGC AGC CT      | GGG GCT CTC AGG AAC CAA TC               |
| <i>hCCL2</i>   | CAG CCA GAT GCA ATC AAT GCC     | TGG AAT CCT GAA CCC ACT TCT              |
| <i>hCCL5</i>   | CCA GCA GTC GTC TTT GTC AC      | CTC TGG GTT GGC ACA CAC TT               |
| <i>hCCL17</i>  | AGG GAG CCA TTC CCC TTA GA      | TGT TGG GGT CCG AAC AGA TG               |
| <i>hCCL22</i>  | ATC GCC TAC AGA CTG CAC TC      | GAC GGT AAC GGA CGT AAT CAC              |

| <i>GENE</i>   | <i>FORWARD</i>                 | <i>REVERSE</i>                  |
|---------------|--------------------------------|---------------------------------|
| <i>mΔNp63</i> | TGC CCA GAC TCA ATT TAG TGA    | GAG GAG CCG TCC TGA ATC TG      |
| <i>mTAp63</i> | CTC GTG GAA AGA AAG TTA TTA C  | GGG CTG TAC TGA GCA TAT AG      |
| <i>mGapdh</i> | TTC CAC TCT TCC ACC TTC GAT GC | GGG TCT GGG ATG GAA ATT GTG AGG |

|                       |                                 |                                   |
|-----------------------|---------------------------------|-----------------------------------|
| <i>mCxcr2</i>         | ATG CCC TCT ATT CTG CCA GAT     | GTG CTC CGG TTG TAT AAG ATG AC    |
| <i>mCcr4</i>          | GGA AGG TAT CAA GGC ATT TGG G   | GTA CAC GTC CGT CAT GGA CTT       |
| <i>Cxcl1</i>          | TGA GCT GCG CTG TCA GTG CCT     | AGA AGC CAG CGT TCA CCA GA        |
| <i>Cxcl2</i>          | GAG CTT GAG TGT GAC GCC CCC AGG | GTT AGC CTT GCC TTT GTT CAG TAT C |
| <i>mER</i>            | AAT GCA AGA ACG TTG TGC CC      | TCT GCT TCC GGG GGT ATG TA        |
| <i>mPR</i>            | GTG TCG TCT GTA GTC TCG CC      | GAG AAA GCT CCC TCC ACG TC        |
| <i>mCxcl3</i>         | CCA TCC AGA GCT TGA CGG TG      | TGG GGG TTG AGG CAA ACT TC        |
| <i>mCxcl10</i>        | CCA AGT GCT GCC GTC ATT TTC     | TCC CTA TGG CCC TCA TTC TCA       |
| <i>mCcl2</i>          | TTA AAA ACC TGG ATC GGA ACC AA  | GCA TTA GCT TCA GAT TTA CGG GT    |
| <i>mCcl3</i>          | TGT ACC ATG ACA CTC TGC AAC     | CAA CGA TGA ATT GGC GTG GAA       |
| <i>mCcl5</i>          | GCT GCT TTG CCT ACC TCT CC      | TCG AGT GAC AAA CAC GAC TGC       |
| <i>mCcl17</i>         | TAC CAT GAG GTC ACT TCA GAT GC  | GCA CTC TCG GCC TAC ATT GG        |
| <i>mCcl22</i>         | AGG TCC CTA TGG TGC CAA TGT     | CGG CAG GAT TTT GAG GTC CA        |
| <i>mKeratin14</i>     | AGG GCT CTT GTG GTA TCG GT      | ACC ATA GCC ACC TCC AAT CC        |
| <i>mKeratin8</i>      | AGG ACT GAC CGA CGA GAT CA      | CTC GTA CTG GGC ACG AAC TT        |
| <i>mAngiopoietin2</i> | CCA ACT CCA AGA GCT CGG TT      | CGG TGT TGG ATG ACT GTC CA        |
| <i>mS100A8</i>        | AGA AGG CCT TGA GCA ACC TC      | ATC GCA AGG AAC TCC TCG AA        |

| <i>GENE</i>                     | <i>FORWARD</i>            | <i>REVERSE</i>              |
|---------------------------------|---------------------------|-----------------------------|
| <i>Human GAPDH</i><br>(Genomic) | CTG GGC TAC ACT GAG CAC C | AAG TGG TCG TTG AGG GCA ATG |
| <i>Mouse Gapdh</i><br>(Genomic) | AAC ATC AAA TGG GGT GAG G | GGC CTT CTC CAT GGT GGT     |

Supplemental Table 4: Recombinant proteins and synthetic antagonists

| <i>Protein/compound</i>                      | <i>Company</i>    | <i>Catalog number</i> | <i>Activity</i> |
|----------------------------------------------|-------------------|-----------------------|-----------------|
| Recombinant Human CXCL2                      | R&D Systems       | 276-GB                |                 |
| Recombinant Human CCL22                      | R&D Systems       | 336-MD                |                 |
| SB255002                                     | Tocris Bioscience | 2725                  | Cxcr2 blocker   |
| C021 Dihydrochloride                         | Tocris Bioscience | 3581                  | Ccr4 Blocker    |
| Recombinant Mouse Chitinase 3-like 1 Protein | R&D Systems       | 2649-CH-050           |                 |
| Recombinant Mouse MMP-9 Protein              | R&D Systems       | 909-MM-010            |                 |

1. Curtis C, Shah SP, Chin SF, Turashvili G, Rueda OM, Dunning MJ, Speed D, Lynch AG, Samarajiwa S, Yuan Y, et al. The genomic and transcriptomic architecture of 2,000 breast tumours reveals novel subgroups. *Nature*. 2012;486(7403):346-52.
2. Welte T, Kim IS, Tian L, Gao X, Wang H, Li J, Holdman XB, Herschkowitz JI, Pond A, Xie G, et al. Oncogenic mTOR signalling recruits myeloid-derived suppressor cells to promote tumour initiation. *Nat Cell Biol*. 2016;18(6):632-44.
3. Cancer Genome Atlas N. Comprehensive molecular portraits of human breast tumours. *Nature*. 2012;490(7418):61-70.
